1 **Corneal Biomechanical Alterations in Patients with Chronic Ocular Graft Versus-host**  
2 **Disease**

3 *Research Article*

4 **Giuseppe Giannaccare, MD, PhD,<sup>1</sup> Marco Pellegrini, MD,<sup>1</sup> Leonardo Taroni, MD,<sup>1</sup>**  
5 **Federico Bernabei, MD,<sup>1</sup> Carlotta Senni, MD,<sup>1</sup> Arianna Grendele, MD,<sup>1</sup> Vincenzo**  
6 **Scordia, MD,<sup>2</sup> Emilio C Campos, MD.<sup>1</sup>**

7 *<sup>1</sup>Ophthalmology Unit, S.Orsola-Malpighi University Hospital, University of Bologna,*  
8 *Bologna, Italy.*

9 *<sup>2</sup>Department of Ophthalmology, University of “Magna Graecia”, Catanzaro, Italy.*

10

11

12 *Corresponding Author:*

13 *Giuseppe Giannaccare, MD, PhD*

14 *Ophthalmology Unit, S.Orsola-Malpighi University Hospital, University of Bologna, Italy*

15 *Address: Via Palagi 9, 40138, Bologna, ITALY*

16 *Tel: +39 051 2142845*

17 *Fax: +39 051 342821*

18 *E-mail: giuseppe.giannaccare@gmail.com*

19

20 **Short title:** Corneal Biomechanics in GVHD

21 **ABSTRACT**

22 **Purpose:** To compare corneal biomechanics between patients with ocular graft versus-host  
23 disease (oGVHD) and healthy subjects (controls), and to further correlate these values with  
24 ocular and hematological characteristics.

25 **Materials and Methods:** The following procedures were performed in oGVHD patients and  
26 controls: Schirmer test (ST), break-up time (BUT), corneal and conjunctival staining, tear  
27 matrix metalloproteinase-9 (MMP-9) assay (InflammaDry test, Rapid Pathogen Screening,  
28 Inc, Sarasota, FL). Corneal biomechanics were calculated by using ocular response analyzer  
29 (ORA, Reichert Instruments, Depew, New York, USA). The Mann-Whitney U test was used  
30 to compare continuous variables between oGVHD patients and controls. Correlations of  
31 corneal biomechanics with ocular and hematological parameters were examined using  
32 Spearman's correlation.

33 **Results:** A total of 45 oGVHD patients (mean age  $\pm$  SD,  $51.5 \pm 7.1$  years) and 34 controls  
34 ( $47.8 \pm 6.1$  years) were included. Patients with oGVHD showed significantly lower values of  
35 corneal hysteresis (CH) and corneal resistance factor (CRF) compared to controls  
36 (respectively,  $9.4 \pm 1.8$  mmHg vs  $11.6 \pm 1.6$  and  $9.7 \pm 1.4$  mmHg vs  $12.3 \pm 1.3$ ; always  
37  $p < 0.001$ ). Twenty-nine of the oGVHD eyes (64.4%) were strong-positive for MMP-9, while  
38 16 (35.6%) were weak-positive. Conversely, only 4 of the control eyes (11.8%) were weak-  
39 positive for MMP-9. In patients with oGVHD, CH was significantly correlated with corneal  
40 staining ( $R_s = -0.316$ ,  $p = 0.035$ ), conjunctival staining ( $R_s = -0.437$ ,  $p = 0.003$ ), ST ( $R_s =$   
41  $0.390$ ,  $p = 0.008$ ), BUT ( $R_s = 0.423$ ,  $p = 0.004$ ), oGVHD severity grade ( $R_s = -0.383$ ,  $p =$   
42  $0.009$ ), and MMP-9 positivity grade ( $R_s = -0.429$ ,  $p = 0.003$ ), while CRF was correlated only  
43 with corneal staining ( $R_s = -0.317$ ,  $p = 0.034$ ).

44 **Conclusions:** Corneal biomechanics are reduced in patients with oGVHD, and CH is  
45 negatively correlated with disease severity grade and MMP-9 tear levels.

46 **Key Words:** Corneal biomechanical properties; InflammaDry; ocular GVHD; Ocular  
47 Response Analyzer; dry eye.

48

## 50 **Introduction**

51 Allogeneic hematopoietic stem cell transplantation (HSCT) is an established and potentially  
52 curative treatment for a variety of malignant and non-malignant hematological disorders.  
53 Graft versus-host disease (GVHD) is a multi-organ systemic disease caused by complex  
54 interactions between donor and recipient immune systems and represents the leading cause of  
55 morbidity following HSCT.[1] Chronic ocular GVHD (oGVHD) develops in 40 to 60% of  
56 patients undergoing HSCT, and dry eye disease (DED) represents the hallmark of this  
57 condition.[2-4] The disease is thought to be the result of the progressive immune-mediate  
58 inflammatory damage of ocular surface structures, which may lead to lacrimal and meibomian  
59 glands dysfunction, conjunctival keratinization, corneal epitheliopathy, eyelid laxity and  
60 scarring, and in more severe cases even corneal melting and perforation.[5-7]

61 Recent proteomic studies evaluated the various constituent compositions of tears  
62 inflammatory mediators in eyes with oGVHD and detected increased levels of cytokines and  
63 matrix metalloproteinases (MMPs).[8,9] Among these, MMP-9 is a proteolytic enzyme  
64 involved in the degradation of corneal extracellular matrix components, whose dysregulation  
65 is implicated in impaired wound healing and stromal keratolysis.[10-12] The excessive  
66 proteolytic activity in the cornea determines the degradation of stromal components, that are  
67 known to be the main determinants of biomechanical corneal behavior. Thus, we  
68 hypothesized that higher tears levels of MMP-9 might affect the ultrastructure of the corneal  
69 stroma, producing changes in corneal biomechanics.

70 In the present study, we compared the corneal biomechanical properties in patients with  
71 oGVHD and healthy matched subjects; in addition, we investigated whether these properties  
72 were correlated with ocular surface and hematological characteristics of oGVHD patients.

73

## 75 **Materials and Methods**

### 76 *Study Design and Patients*

77 This prospective case-control study was conducted at a single tertiary-referral Ocular Surface  
78 Center (S.Orsola-Malpighi University Hospital, Bologna, Italy) between January 2018 and  
79 October 2018. The study was performed in accordance with the principles of the Declaration  
80 of Helsinki and was approved by the local Institutional Review Board. Written informed  
81 consent was obtained from all subjects included in the study before any procedure.

82 Consecutive hematological patients who underwent allogeneic HSCT and came at our Center  
83 for routinely ocular surface check-up visits were screened for enrollment. Inclusion criteria  
84 were: age older than 18 years and a diagnosis of chronic oGVHD according to the  
85 International chronic ocular GVHD Consensus Group.[13] The severity of oGVHD was  
86 graded as none (grade 0), mild/moderate (grade I) and severe (grade II).[13] Healthy sex- and  
87 age-matched subjects acted as controls. All the study procedures were carried out in one eye  
88 for both patients and controls according to an automatic randomization procedure  
89 ([www.randomization.com](http://www.randomization.com)).

90 Exclusion criteria for both groups included any prior ophthalmologic surgery in the last year,  
91 keratoconus, corneal dystrophy, contact lens wearing, glaucoma, spherical equivalent  $\geq 5$   
92 diopters, astigmatism  $\geq 3$  diopters and any ocular infection within 3 months prior to  
93 enrollment.

94 Clinical data including demographic characteristics, ongoing systemic and topical therapies,  
95 hematological diagnosis, duration of disease, type of HSCT donor, time from GVHD  
96 diagnosis to ophthalmological evaluation, presence and localization of systemic GVHD, and  
97 history of previous therapies (i.e. autologous HSCT, radiotherapy [RT], and chemotherapy  
98 [CT]) were collected at the time of the ophthalmic evaluation.

## 99 ***InflammaDry Testing***

100 The InflammaDry test (Rapid Pathogen Screening, Inc, Sarasota, FL) was performed  
101 according to the manufacturer's instructions to determine whether both oGVHD patients and  
102 control subjects exhibited pathological levels of MMP-9.[14] The use of any topical  
103 ophthalmic medications was discontinued two hours prior to examination. In brief, a tear  
104 sample was collected by lowering the palpebral conjunctiva and gently dabbing the fleece of  
105 the sample collector 8 to 10 times in multiple locations, allowing the patient to blink between  
106 dabs to ensure saturation. The sampling fleece glistened or turned pink when an adequate  
107 sample was collected, and was then snapped into the test cassette. The absorbent tip was  
108 immersed into the buffer vial for 20 seconds and laid flat on a horizontal surface for 10  
109 minutes before interpretation of test results. The presence of one blue line and one red line in  
110 the test result window indicated a positive test result ( $\text{MMP-9} \geq 40 \text{ ng/mL}$ ), whereas only one  
111 blue line indicated a negative test result ( $\text{MMP-9} < 40 \text{ ng/mL}$ ). In addition, the positive red  
112 line was compared with the grading index to classify the result as weak-positive and strong-  
113 positive.[15] Three well-trained observers (FB, CS & AG) individually interpreted the  
114 InflammaDry grading result, masked to both subject characteristics and clinical diagnosis.  
115 The result was confirmed when the interpretations of at least two of the observers were in  
116 agreement.

## 117 ***Ocular Surface Work-up***

118 Subjective symptoms of ocular discomfort were scored by the Ocular Surface Disease Index  
119 (OSDI) questionnaire. Slit-lamp examination with ocular surface staining was performed after  
120 administration of 2mL of 2% fluorescein dye using the blue cobalt filter and a 7503 Boston  
121 yellow filter kit to enhance staining details. Corneal and conjunctival staining were graded  
122 using respectively the Oxford score[16], and the van Bijsterveld score[17]; Schirmer test type

123 I and break up time (BUT) measurements were performed according to the Dry Eye  
124 Workshop guidelines.[18]

### 125 *Ocular Response Analyzer Measurements*

126 The ocular response analyzer (ORA, Reichert Instruments, Depew, New York, USA)  
127 measures two applanation pressure points during a dynamic bi-directional applanation process  
128 generated by a precisely metered air pulse. The first pressure point occurs as an air puff  
129 pushes the cornea inward, while the second pressure point as the cornea returns from the  
130 applanated state to normal. The difference between these two pressures is defined as the CH,  
131 while CRF is calculated as a linear function of the two values. The average of both pressures  
132 provides Goldmann-correlated IOP (IOPg), while the corneal-compensated IOP (IOPcc) is the  
133 recalculated IOP value using corneal biomechanical information provided by the CH  
134 measurement.[19]

135 All the ORA examinations were performed by the same operator (LT) blinded to subject's  
136 characteristics. The use of any topical ophthalmic medications was discontinued two hours  
137 prior to examination. Before each examination, central corneal thickness (CCT) values  
138 obtained with an ultrasonic pachymeter (Dicon P55, Paradigm Medical Industries Inc., Salt  
139 Lake City, UT, USA) were inserted in the software. Because of the potential confounding  
140 effect of diurnal IOP variation, all measurements were obtained between 10 AM and 12  
141 PM. All included ORA measurements had a waveform score > 7.0.[20] The average values of  
142 four measurements with desirable curves were recorded for statistical analysis.

### 143 *Statistical Analysis*

144 The SPSS statistical software (SPSS Inc, Chicago, Illinois, USA) was used for data analysis.  
145 Values are expressed as mean  $\pm$  standard deviation (SD). The Mann-Whitney U test was used  
146 to compare continuous variables between ocular GVHD patients and control subjects. The  $\chi^2$

147 test was used to compare dichotomous variables between ocular GVHD patients and control  
148 subjects. Correlations of corneal biomechanical properties with demographical, hematological  
149 and ocular parameters in the oGVHD group were examined using Spearman's correlation  
150 analysis. A Bonferroni correction for multiple testing was used by multiplying the observed  $p$ -  
151 value with the number of comparisons within each analysis. A  $p$  value  $< 0.05$  was considered  
152 statistically significant.

## 154 Results

155 We screened a total of 51 post-HSCT patients during the study period. Of these, 45 patients  
156 fulfilled the inclusion criteria, and were finally enrolled in the study: 5 of them (11.1% of the  
157 total) belonged to the oGVHD severity grade 0, 11 (24.4%) to grade I and 29 (64.4%) to  
158 grade II. The remaining 6 patients were excluded from the analysis because the diagnosis of  
159 oGVHD was not reached ( $n = 3$ ), or due to the presence of significant corneal alterations  
160 (neovessels) hampering accurate ORA measurements ( $n = 3$ ). Thirty-four healthy subjects  
161 were enrolled as control group. The demographic and clinical parameters of patients included  
162 in the analysis are reported in Table 1. No significant differences in age and sex distribution  
163 between hematological patients and control subjects were found (always  $p > 0.05$ ).

164

165 **Table 1:** Demographic and clinical parameters of patients with ocular GVHD.

| Characteristic                             | Number (%)  |
|--------------------------------------------|-------------|
| Patients                                   | 45          |
| Males                                      | 22 (48.9)   |
| Females                                    | 23 (51.1)   |
| Age (years)                                | 51.2 ± 7.1  |
| Hematological diagnosis                    |             |
| AML                                        | 14 (31.1)   |
| ALL                                        | 12 (26.7)   |
| HL                                         | 2 (4.4)     |
| Non-HL                                     | 4 (8.8)     |
| CML                                        | 9 (20)      |
| CLL                                        | 2 (4.4)     |
| MM                                         | 2 (4.4)     |
| Systemic GVHD                              |             |
| None                                       | 4 (8.8)     |
| Skin                                       | 28 (62.2)   |
| Lung                                       | 14 (31.1)   |
| Mouth                                      | 17 (37.8)   |
| G-I tract                                  | 12 (26.7)   |
| Genitalia                                  | 5 (11.1)    |
| Other                                      | 9 (20)      |
| Time from GVHD diagnosis to visit (months) | 65.9 ± 54.9 |
| Donor                                      |             |
| Unrelated                                  | 27 (60.0)   |
| Related                                    | 18 (40.0)   |
| Previous hematological therapies           |             |



|                          |           |
|--------------------------|-----------|
| HSCT                     | 9 (20)    |
| RT                       | 29 (64.4) |
| CT                       | 6 (13.3)  |
| Ongoing systemic therapy |           |
| None                     | 14 (31.1) |
| Corticosteroids          | 21 (46.7) |
| Other Immunosuppressants | 7 (15.5)  |
| Antivirals/Antibiotics   | 23 (51.1) |
| Other                    | 6 (13.3)  |
| Ongoing topical therapy  |           |
| Corticosteroids          | 19 (42.2) |
| Cyclosporine             | 6 (13.3)  |
| Tear substitutes         | 45 (100)  |
| Blood-derived eye drops  | 9 (20)    |
| Other                    | 10 (22.2) |

166 GVHD: Graft versus-host disease; AML: Acute myeloid leukemia; ALL: Acute lymphoblastic leukemia; HL:  
 167 Hodgkin lymphoma; CML: Chronic myeloid leukemia; CLL: Chronic lymphocytic leukemia; MM: Multiple  
 168 myeloma; G-I: gastro-intestinal; HSCT: hematopoietic stem cell transplantation; RT: radiotherapy; CT:  
 169 chemotherapy.

170

171 Ocular surface parameters of oGVHD patients and control subjects are reported in Table 2. A  
 172 significant difference of all parameters was found between the two groups (always  $p < 0.05$ ).

173

174 **Table 2:** Ocular surface parameters in patients with ocular GVHD and control subjects.

| Parameter                        | Ocular GVHD | Control group | <i>P</i> |
|----------------------------------|-------------|---------------|----------|
| OSDI score                       | 58.7 ± 21.4 | 7.1 ± 3.1     | < 0.001  |
| Schirmer test I (mm/5')          | 2.9 ± 3.6   | 23.2 ± 8.6    | < 0.001  |
| BUT (s)                          | 1.9 ± 2.0   | 10.9 ± 3.1    | < 0.001  |
| Corneal staining (Oxford score)  | 2.4 ± 1.4   | 0.2 ± 0.4     | < 0.001  |
| Conjunctival staining (VB score) | 9.4 ± 5.6   | 0.7 ± 0.5     | < 0.001  |

175 GVHD: Graft versus-host disease; OSDI: Ocular surface disease index; BUT: break-up time; VB: van  
 176 Bijsterveld.

177

178 Patients with oGVHD showed significantly lower values of CH and CRF compared to  
 179 controls (respectively, 9.4 ± 1.8 mmHg vs 11.6 ± 1.6 and 9.7 ± 1.4 mmHg vs 12.3 ± 1.3;

180 always  $p < 0.001$ ) (Table 3). In addition, CCT was significantly lower in oGVHD patients  
181 compared to controls ( $510.7 \pm 32.5 \mu\text{m}$  vs  $537.9 \pm 29.8$ ,  $p < 0.001$ ).

182

183 **Table 3:** Corneal biomechanical properties and central corneal thickness in patients with  
184 ocular GVHD and control subjects.

| Parameter             | Ocular GVHD      | Control group    | <i>P</i>         |
|-----------------------|------------------|------------------|------------------|
| CH (mmHg)             | $9.4 \pm 1.8$    | $11.6 \pm 1.6$   | <b>&lt;0.001</b> |
| CRF (mmHg)            | $9.7 \pm 1.4$    | $12.3 \pm 1.3$   | <b>&lt;0.001</b> |
| IOPg (mmHg)           | $16.2 \pm 5.0$   | $18.1 \pm 3.6$   | 0.054            |
| IOPcc (mmHg)          | $17.7 \pm 5.6$   | $16.9 \pm 4.1$   | 0.527            |
| CCT ( $\mu\text{m}$ ) | $510.7 \pm 32.5$ | $537.9 \pm 29.8$ | <b>&lt;0.001</b> |

185 CCT: Central corneal thickness; GVHD: Graft versus-host disease; CH, corneal hysteresis; CRF, corneal  
186 resistance factor; IOPg; Goldmann-correlated intraocular pressure; IOPcc, corneal-compensated intraocular  
187 pressure.

188

189 The proportion of MMP-9 tear film positivity significantly differs between the two groups ( $P$   
190  $< 0.001$ ). In particular, 29 of the oGVHD eyes (64.4% of the total) were strong-positive for  
191 MMP-9, while 16 (35.6%) were weak-positive. Conversely, only 4 of the control eyes  
192 (11.8%) were weak-positive for MMP-9 (Figure 1).

193

194 **Figure 1:** Ocular response analyzer measurement signals and InflammDry assays of 3  
195 representative subjects: healthy control, negative for MMP-9 (Parts A, E); ocular graft versus-  
196 host disease (oGVHD) patient (severity grade I), weak-positive for MMP-9 (Parts B, F);  
197 oGVHD patient (severity grade II), strong-positive for MMP-9 (Parts C, F).

198

199 In patients with oGVHD, CH was significantly correlated with corneal staining ( $R_s = -0.316$ ,  
200  $p = 0.035$ ), conjunctival staining ( $R_s = -0.437$ ,  $p = 0.003$ ), Schirmer test ( $R_s = 0.390$ ,  $p =$

201 0.008), BUT ( $R_s = 0.423$ ,  $p = 0.004$ ), oGVHD severity grade ( $R_s = -0.383$ ,  $p = 0.009$ ), and  
202 MMP-9 positivity grade ( $R_s = -0.429$ ,  $p = 0.003$ ), while CRF was correlated only with corneal  
203 staining ( $R_s = -0.317$ ,  $p = 0.034$ ).

204 No significant correlations were found between CH and CRF values and hematological  
205 characteristics (always  $p > 0.05$ ).

## 206 **Discussion**

207 The cornea is a complex biomechanical composite, and the collagen present in the Bowman's  
208 layer and stroma provides the major contribution to its biomechanical behavior.[21,22]  
209 Frequently, oGVHD determines the damage of corneal epithelium that can be observed at slit  
210 lamp examination as punctate keratopathy, filamentary keratitis, and persistent epithelial  
211 defect. In more severe cases, the persistent impairment of wound healing alters the stromal  
212 ultrastructure, with the onset of keratolysis, corneal melting and even perforation.[23] These  
213 alterations of both corneal epithelium and stroma might produce changes to a various extent  
214 of biomechanical properties of the cornea of oGVHD patients.

215 To date, few previous studies have investigated corneal biomechanics in patients with DED  
216 owing to different etiologies, but not oGVHD, by means of both ORA and CorVis ST.[24-27]  
217 The former is a non-contact tonometer that provides the measure of two parameters of corneal  
218 biomechanics: CRF that reflects the overall resistance of the cornea, and CH that measures  
219 the viscoelastic properties of the corneal tissue detecting the changes in the organization of  
220 collagen lamellae. CorVis ST is a device that employs an ultrahigh speed Scheimpflug camera  
221 to record dynamic deformation of the cornea. Impaired values of corneal biomechanics have  
222 been reported in DED patients with and without Sjögren's syndrome[24-26]; conversely, Firat  
223 et al[27] reported no alterations of corneal biomechanical parameters in patients with DED.  
224 However, this study did not evaluate comprehensively ocular surface parameters, and did not  
225 stratify patients according to the severity of DED.

226 To the best of our knowledge, this is the first study evaluating corneal biomechanics in the  
227 setting of oGVHD. This condition is a type of iatrogenic DED, whose prevalence is  
228 increasing due to the widespread adoption of HSCT for the treatment of hematological  
229 disorders. We found significantly lower values of CH and CRF in oGVHD patients compared

230 to healthy matched subjects. In addition, the severity of ocular surface impairment in these  
231 patients was associated with a greater alteration of corneal biomechanical properties, in  
232 particular for CH. This parameter reflects the viscoelastic properties of corneal tissue,  
233 detecting the changes in the organization of collagen lamellae. The most reasonable  
234 explanation to these findings is that the ocular surface inflammation caused by oGVHD might  
235 affect the corneal stroma ultrastructure by enhancing the rates of collagen and elastin  
236 enzymatic degradation. In particular, MMPs are proteolytic enzymes produced by stressed  
237 ocular surface epithelial cells, as well as by the immune cells that infiltrate these tissues. They  
238 are involved in the degradation of extracellular matrix components, and contribute to  
239 inflammation, wound healing, and tissue remodeling.[10-12] Overexpression of MMPs have  
240 been linked with corneal complications like ulcer and melting, that occur in the most severe  
241 stages of oGVHD, probably because of their role in the remodeling of extracellular  
242 matrix.[28-29]

243 Among MMP-family, MMP-9 represents the primary matrix-degrading enzyme of the ocular  
244 surface and is the only one that can be tested with a commercially available assay in clinical  
245 outpatient settings.[30] In the present study, we tested MMP-9 positivity in the tear film of  
246 patients with oGVHD and healthy subjects. All oGVHD patients resulted positive to MMP-9  
247 assays against the negligible percentage of positivity among control subjects. This result is  
248 consistent with recent studies, which demonstrated increased tear levels of elastolytic  
249 enzymes, including MMP-9 and neutrophil elastase, in patients with oGVHD.[8,9] In  
250 addition, in order to overcome the drawback of the dichotomous result of MMP-9, which  
251 corresponds to either one of “negative” or “positive”, we employed a semi-quantitative  
252 method of grading the intensity of positivity, as already suggested by others.[31] Thus, we  
253 demonstrated that oGHVD patients exhibited different grades of MMP-9 positivity, and  
254 stronger positivity grade was associated with higher impairment of corneal biomechanics.

255 This finding confirms the possible role of MMP-9 in the alteration of the stromal composition  
256 and organization also in the setting of oGVHD.

257 Conflicting results are available in the literature regarding central corneal thickness in DED.  
258 Although few studies showed similar values between DED patients and normal subjects[24-  
259 27], we found significantly lower values in patients with oGVHD compared to controls, in  
260 agreement with others.[32-34] The corneal thinning in DED is attributed to the increased  
261 osmolarity of the tear film that induces the activation of the inflammatory cascade and  
262 stimulate the production of high levels of the cytokine and MMP-9 by the distressed epithelial  
263 cells. These inflammatory events may lead to apoptotic death of surface epithelial cells of  
264 cornea and to destructive keratolysis and thinning.[35]

265 The main limitation of the study is related to the use of InflammDry for the detection of  
266 pathological values of tear MMP-9. Although this is the only assay commercially available, a  
267 proteomic study with tear dosage of each type of MMPs would have provided a more accurate  
268 quantification of ocular surface inflammation, and its correlation with corneal biomechanics.

269

271 **Conclusion**

272 The present study shows that oGVHD impairs biomechanical properties of the cornea, likely  
273 as a result of the alterations of ultrastructure and architecture of stromal collagen fibrils. Since  
274 corneal biomechanical alterations are closely related to the grade of ocular surface  
275 inflammation, they might represent a possible new surrogate marker of oGVHD severity.

276

277 **Declarations of Interest:** None

278 **Funding:** The authors received no specific funding for this work.

279 **Author contribution:**

280 G.G. conceptualization, project administration, writing – original draft. M.P. investigation,  
281 formal analysis. L.T. data curation, investigation. F.B. visualization, investigation. C.S.  
282 visualization, investigation. A.G. visualization, investigation. E.C.C. validation, writing –  
283 review and editing. V.S. validation, writing – review and editing.

284

285

286

287

288

289

290

## 291 **References**

- 292 1. Ferrara JL, Levine JE, Reddy P, Holler E. Graft-versus-host disease. *Lancet* 2009;  
293 373:1550–1561.
- 294 2. Kim SK. Ocular graft vs. host disease. *Ocul Surf* 2005;3:S177–179.
- 295 3. Shikari H, Antin JH, Dana R. Ocular graft-versus-host disease: a review. *Surv*  
296 *Ophthalmol* 2013;58:233–251.
- 297 4. Giannaccare G, Bonifazi F, Sessa M, Dan E, Arpinati M, Fresina, M, et al. Ocular  
298 surface analysis in hematological patients before and after allogenic hematopoietic  
299 stem cell transplantation: implication for daily clinical practice. *Eye* 2017;31:1417-  
300 1426.
- 301 5. Tabbara KF, Al-Ghamdi A, Al-Mohareb F, Ayas M, Chaudhri N, Al-Sharif F, et al.  
302 Ocular findings after allogeneic hematopoietic stem cell transplantation.  
303 *Ophthalmology* 2009;116:1624–1629.
- 304 6. Giannaccare G, Bonifazi F, Sebastiani S, Sessa M, Pellegrini M, Arpinati M, et al.  
305 Meibomian gland dropout in hematological patients before hematopoietic stem cell  
306 transplantation. *Cornea* 2018;37:1264-1269.
- 307 7. Giannaccare G, Bernabei F, Pellegrini M, Arpinati M, Bonifazi F, Sessa M, et al.  
308 Eyelid metrics assessment in patients with chronic ocular graft versus-host disease.  
309 *Ocul Surf* 2018;S1542-0124(18)30234-9.
- 310 8. Arafat SN, Robert MC, Abud T, Spurr-Michaud S, Amparo F, Dohlman CH, et al.  
311 Elevated neutrophil elastase in tears of ocular graft-versus-host disease patients. *Am J*  
312 *Ophthalmol* 2017;176:46–52.
- 313 9. Nair S, Vanathi M, Mahapatra M, Seth T, Kaur J, Velpandian T, et al. Tear  
314 inflammatory mediators and protein in eyes of post allogenic hematopoeitic stem cell  
315 transplant patients. *Ocul Surf* 2018;16:352–367.



- 316 10. Fini ME, Girard MT, Matsubara M. Collagenolytic/gelatino-lytic enzymes in corneal  
317 wound healing. *Acta Ophthalmol Suppl* 1992;70:26–33.
- 318 11. Fini ME, Cook JR, Mohan R. Proteolytic mechanisms in corneal ulceration and repair.  
319 *Arch Dermatol Res* 1998;290:S12–S23.
- 320 12. Gordon GM, Austin JS, Sklar AL, Feuer WJ, LaGie, AJ, Fini ME. Comprehensive  
321 gene expression profiling and functional analysis of matrix metalloproteinases and  
322 TIMPs, and identification of ADAM-10 gene expression, in a corneal model of  
323 epithelial resurfacing. *J Cell Physiol* 2011;226: 1461–1470.
- 324 13. Ogawa Y, Kim SK, Dana R, Clayton J, Jain S, Rosenblatt MI, et al.. International  
325 chronic ocular graft-versus-host disease (GVHD) Consensus group: proposed  
326 diagnostic criteria for chronic GVHD (Part I). *Sci Rep* 2013;3:3419.
- 327 14. Lanza NL, McClellan AL, Batawi H, Felix ER, Sarantopoulos KD, Levitt RC, et  
328 al. Dry eye profiles in patients with a positive elevated surface matrix  
329 metalloproteinase 9 point-of-care test versus negative patients. *Ocul Surf*  
330 2016;14:216–223.
- 331 15. Park JY, Kim BG, Kim JS, Hwang JH. Matrix Metalloproteinase 9 Point-of-Care  
332 Immunoassay Result Predicts Response to Topical Cyclosporine Treatment in Dry  
333 Eye Disease. *Trans Vis Sci Tech* 2018;7:31.
- 334 16. Bron AJ, Evans VE, Smith JA. Grading of corneal and conjunctival staining in the  
335 context of other dry eye tests. *Cornea* 2003;22:640–650.
- 336 17. Van Bijsterveld OP. Diagnostic tests in the sicca syndrome. *Arch Ophthalmol*  
337 1969;82:10–14.
- 338 18. Bron AJ, Abelson MB, Ousler G, Pearce E, Tomlinson A, Yokoi N, et al.  
339 Methodologies to diagnose and monitor dry eye disease: report of the diagnostic

- 340 methodology subcommittee of the international Dry Eye Workshop (2007). *Ocul Surf*  
341 2007;5:108–152.
- 342 19. Luce DA. Determining in vivo biomechanical properties of the cornea with an ocular  
343 response analyzer. *J Cataract Refract Surg* 2005;31:156–162.
- 344 20. Ayala M, Chen E. Measuring corneal hysteresis: threshold estimation of the waveform  
345 score from the Ocular Response Analyzer. *Graefes Arch Clin Exp*  
346 *Ophthalmol* 2012;250:1803–1806.
- 347 21. Ma J, Wang Y, Wei P, Jhanji V. Biomechanics and structure of the cornea:  
348 implications and association with corneal disorders. *Surv Ophthalmol* 2018;63:851-  
349 861.
- 350 22. Boote C, Dennis S, Huang Y, Quantock AJ, Meek KM. Lamellar orientation in human  
351 cornea in relation to mechanical properties *J Struct Biol* 2005;149:1-6.
- 352 23. Yeh PT, Hou YC, Lin WC, Wang IJ, Hu FR. Recurrent corneal perforation and acute  
353 calcareous corneal degeneration in chronic graft-versus-host disease. *J Formos Med*  
354 *Assoc* 2006;105:334-9.
- 355 24. Borrego-Sanz L, Sáenz-Francés San Baldomero F, Díaz Valle D, Santos Bueso  
356 E, Sánchez Jean R, Martínez de la Casa JM, et al. Comparison  
357 of corneal biomechanical properties of patients with dry eye secondary to Sjögren's  
358 syndrome and healthy subjects. *J Fr Ophtalmol* 2018;41:802-808.
- 359 25. Long Q, Wang J, Yang X, Jin Y, Ai F, Li Y. Assessment of Corneal Biomechanical  
360 Properties by CorVis ST in Patients with Dry Eye and in Healthy Subjects. *J*  
361 *Ophthalmol* 2015;2015:380624.

- 362 26. Long Q, Wang JY, Xu D, Li Y. Comparison of corneal biomechanics in Sjögren's  
363 syndrome and non-Sjögren's syndrome dry eyes by Scheimpflug based device. *Int J*  
364 *Ophthalmol* 2017;10:711-716.
- 365 27. First PG, Doganay S. Corneal hysteresis in patients with dry eye. *Eye* 2011;25:1570-  
366 1574.
- 367 28. Brejchova K, Liskova P, Hrdlickova E, Filipec M, Jirsova K. Matrix  
368 metalloproteinases in recurrent corneal melting associated with primary Sjögren's  
369 syndrome. *Mol Vis* 2009;15:2364-72.
- 370 29. Liu Z, Pflugfelder SC. Corneal thickness is reduced in dry eye. *Cornea* 1999;18:403-  
371 407.
- 372 30. Acera A, Vecino E, Duran JA. Tear MMP-9 levels as a marker of ocular surface  
373 inflammation in conjunctivochalasis. *Invest Ophthalmol Vis Sci* 2013;23;54:8285-  
374 8291.
- 375 31. Inagaki E, Ogawa Y, Matsumoto Y, Kawakita T, Shimmura S, Tsubota, K.  
376 Four cases of corneal perforation in patients with chronic graft-versus-host disease.  
377 *Mol Vis* 2011;17:598-606.
- 378 32. Ali NM, Hamied FM, Farhood QK. Corneal thickness in dry eyes in an Iraqi  
379 population. *Clin Ophthalmol* 2017;11:435-440.
- 380 33. Sanchis-Gimeno JA, Herrera M, Alonso L, Rahhal MS, Martinez Soriano F.  
381 Morphometric differences between normal and dry eyes. *Eur J Anat* 2005;9:143-148.
- 382 34. Martínez Soriano F. Differences in ocular dimensions between normal and dry eyes.  
383 *Surg Radiol Anat* 2006;28:267-270.
- 384 35. Gunes A, Inal EE, Tok L, Tok O. Evaluation of central and peripheral corneal  
385 thicknesses in patients with rheumatoid arthritis. *Arq Bras Oftalmol* 2015;78:236-240.

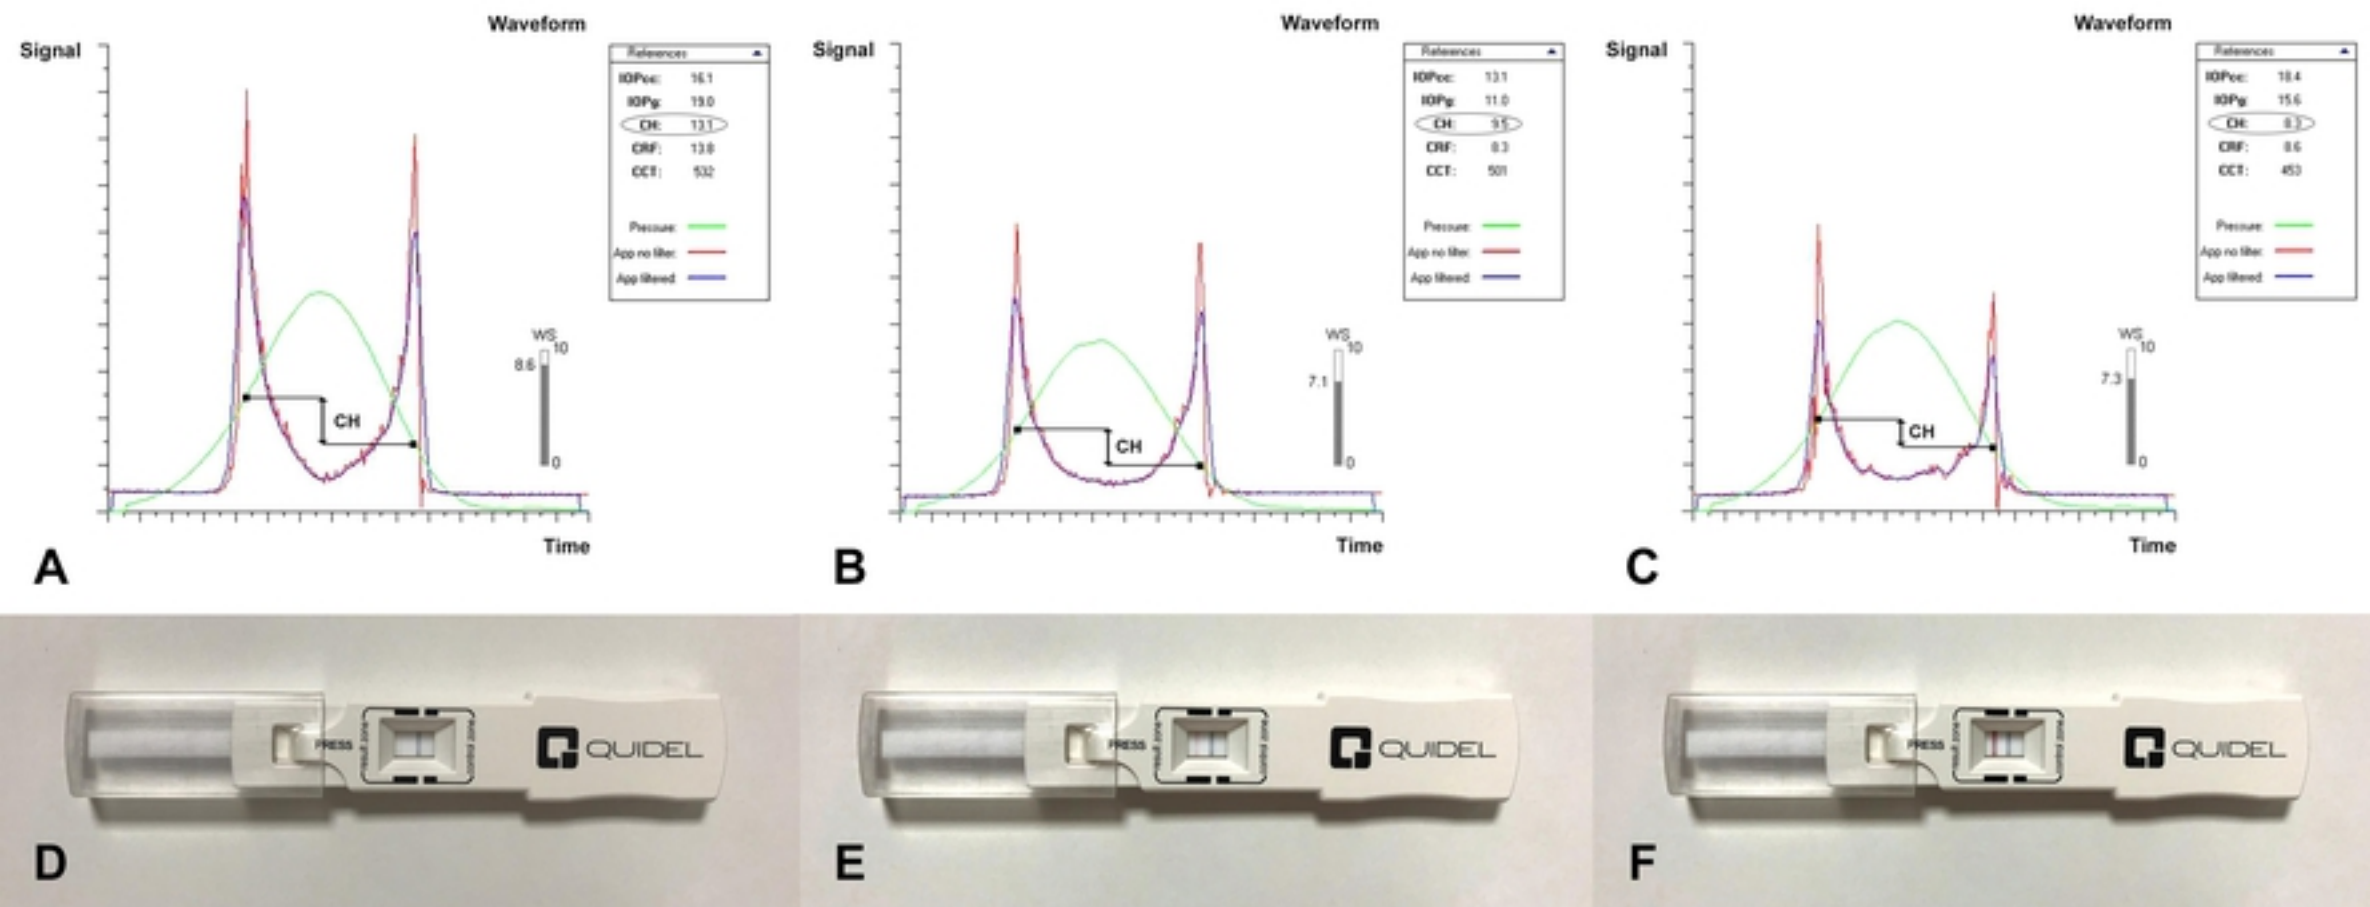

Figure 1
